# Supplementary material
Source: Springer Nature journal article supplement (https://www.springermedizin.de/resource/supplementary/12888_2013_1573_MOESM1_ESM.pdf/9481406)
Supplement: MOESM1 [file 9481406]

## Data collection

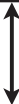

## Debriefing sessions with the data collection team

First analytical phase

- Discussing emerging themes and impressions of participants
- Developing questions and probes for the topic guides to enhance and focus data collection

*Transcription and translation of FGD and interview recordings*

## Grounded theory analysis: immersion in the data

Second analytical phase

- Breaking down the data into meaningful groups of words ('micro level coding') or sections ('macro level coding')
- Relating concepts to each other ('axial coding')
- Analytical tools
- Writing memos
